# Supplementary material for: A facile strategy for photoactive nanocellulose-based antimicrobial materials
Source: Royal Society of Chemistry journal article supplement (doi:10.1039/c9gc00551j), 2019-01-01
Supplement: c9gc00551j1.pdf [file c9gc00551j1.pdf]

## Supporting Information

### A Facile Strategy for Photoactive Nanocellulose-based Antimicrobial Materials

David Ramirez Alvarado,<sup>a</sup> Dimitris S. Argyropoulos,<sup>b</sup> Frank Scholle<sup>c</sup>, Bharadwaja S.T. Peddinti<sup>d</sup> and Reza A. Ghiladi<sup>a\*</sup>

Departments of <sup>a</sup>Chemistry, <sup>b</sup>Forest Biomaterials, <sup>c</sup>Biological Sciences, and <sup>d</sup>Chemical & Biomolecular Engineering, North Carolina State University, Raleigh, North Carolina 27695, USA

#### Table of Contents

**Figure S1.** Representative colony-counting data (TSB-agar plates) obtained for the photodynamic inactivation studies employing 5  $\mu\text{M}$   $\text{A}_3\text{B}^{3+}$ -NFC against methicillin-resistant *S. aureus* ATCC-44 (MRSA).

**Figure S2.** Scanning electron microscopy images of (A) unmodified freeze-dried NFC and (B)  $\text{A}_3\text{B}^{3+}$ -NFC.

#### **Photosensitizer singlet oxygen quantum yield ( $\Phi_\Delta$ ) determination.**

**Table S1.** Singlet oxygen quantum yield values ( $\Phi_\Delta$ ) as determined by time-resolved phosphorescence measurements in  $\text{D}_2\text{O}$ .

**Figure S3.** ATR-IR spectra of  $\text{A}_3\text{B}^{3+}$  (**3**) and  $\text{ZnA}_3\text{B}^{3+}$  (**4**).

#### **LIVE/DEAD Bacterial Viability Assays**

**Figure S4.** Confocal laser scanning microscopy images of a) material-free cells only (live control), (b) *S. aureus* cells exposed to ethanol (dead control), (c) *S. aureus* cells exposed to  $\text{A}_3\text{B}^{3+}$ -NFC kept in dark (material-present dark control), and (d-f) *S. aureus* cells exposed to  $\text{A}_3\text{B}^{3+}$ -NFC illuminated at  $65 \pm 5 \text{ mW/cm}^2$ .

#### **Solution Based Antimicrobial Activity of $\text{A}_3\text{B}^{3+}$ (**3**) and $\text{ZnA}_3\text{B}^{3+}$ (**4**).**

**Figure S5.** Solution-based photodynamic inactivation studies of *K. pneumoniae* using  $\text{A}_3\text{B}^{3+}$  and  $\text{ZnA}_3\text{B}^{3+}$  as photosensitizers.

**Without illumination**

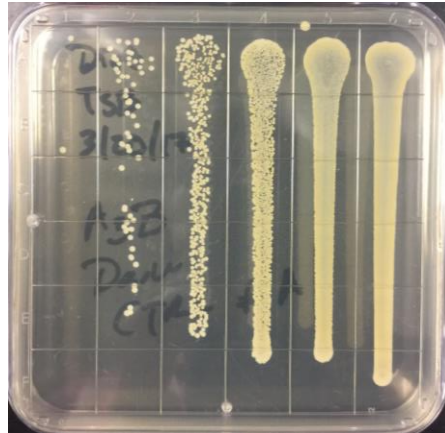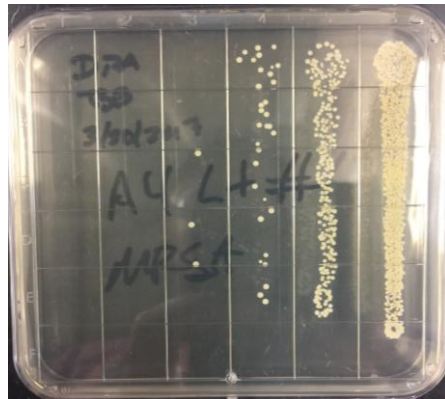

**With illumination**

**Figure S1.** Representative colony-counting data (TSB-agar plates) obtained for the photodynamic inactivation studies employing 5  $\mu\text{M}$   $\text{A}_3\text{B}^{3+}\text{-NFC}$  against methicillin-resistant *S. aureus* ATCC-44 (MRSA): *top panel*, without illumination (material-present dark control); *bottom panel*, illuminated study (60 min, 400–700 nm,  $65 \pm 5$  mW/cm<sup>2</sup>). Each vertical column represents a 1:10 serial dilution, with increasing dilution from right to left.

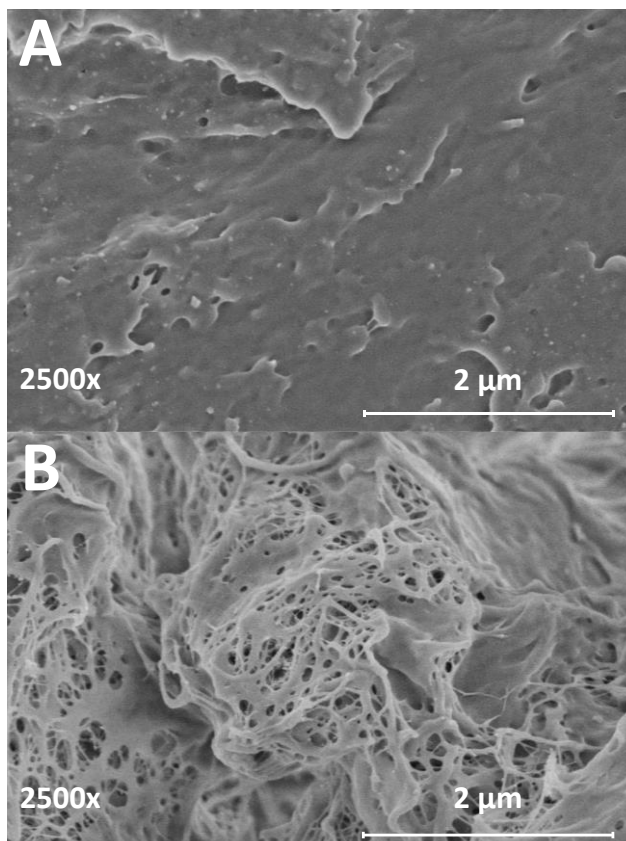

**Figure S2.** Scanning electron microscopy images of (A) unmodified freeze-dried NFC and (B) A<sub>3</sub>B<sup>3+</sup>-NFC.

**Photosensitizer singlet oxygen quantum yield ( $\Phi_{\Delta}$ ) determination by time-resolved phosphorescence measurements.** Time-resolved singlet oxygen phosphorescence experiments were conducted in D<sub>2</sub>O to determine singlet oxygen quantum yield ( $\Phi_{\Delta}$ ) values for **(3)** and **(4)** using TMPyP as the standard ( $\Phi_{\Delta}=0.74^1$ ). Singlet oxygen quantum yield determination relies on its phosphorescence at 1270 nm and by quantitatively comparing emission intensities of optically-equivalent photosensitizer and standard solutions. Samples were prepared to equal absorbance values (0.31) at the excitation wavelength of 433 nm. Due to the weak nature of the <sup>1</sup>O<sub>2</sub> phosphorescence emission band at 1270 nm, sample excitation at 433 nm and emission bandwidth data were performed with a 20 nm (433±10 nm) bandwidth. Emission intensities were baselined and integrated from 1225 and 1325 nm. The <sup>1</sup>O<sub>2</sub> quantum yield values were calculated according to the following equation:

$$Q = Q_R \frac{I}{I_R} \frac{OD_R}{OD} \quad \text{and} \quad OD = 1 - 10^{-Abs} \quad \text{Eq. 1}$$

where the integrated singlet oxygen phosphorescence intensity is represented by I, and OD is the optical density at the excitation wavelength, or range; R refers to the reference photosensitizer, TMPyP.<sup>2</sup>

**Table S1.** Singlet oxygen quantum yield values ( $\Phi_{\Delta}$ ) as determined by time-resolved phosphorescence measurements in D<sub>2</sub>O.

|                                             | $\Phi_{\Delta}$ (D <sub>2</sub> O) |
|---------------------------------------------|------------------------------------|
| A <sub>3</sub> B <sup>3+</sup> <b>(3)</b>   | 0.044 <sup>a</sup>                 |
| ZnA <sub>3</sub> B <sup>3+</sup> <b>(4)</b> | 0.156 <sup>a</sup>                 |

<sup>a</sup> TMPyP ( $\Phi_{\Delta}=0.74$ ) was used as reference PS for <sup>1</sup>O<sub>2</sub> quantum yield measurements.<sup>1</sup>

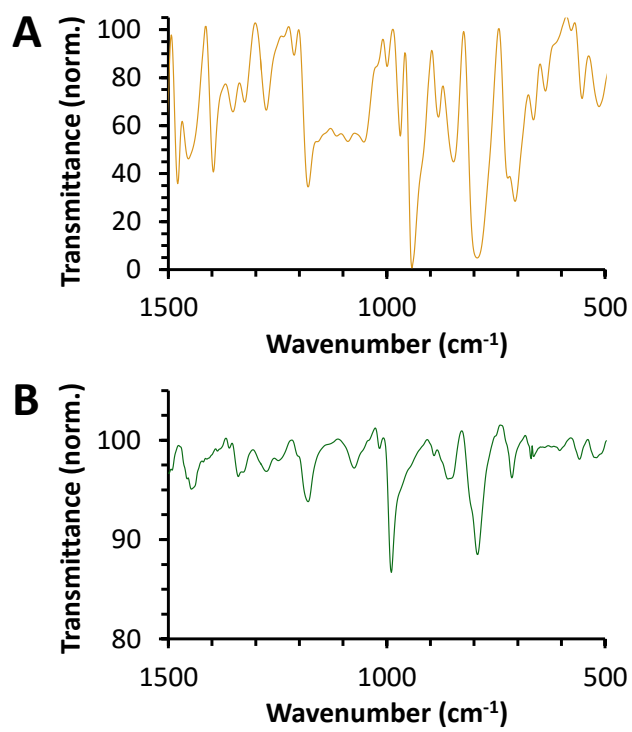

**Figure S3.** ATR-IR spectra of  $A_3B^{3+}$  (3) and  $ZnA_3B^{3+}$  (4).

### LIVE/DEAD Bacterial Viability Assays

Confocal laser scanning microscopy was performed to image *S. aureus* (ATCC-2913) after staining the cells with a LIVE/DEAD BacLight Bacterial Viability and Counting Kit that consisted of green-fluorescent SYTO9 and red-fluorescent propidium iodide (PI) stains. As shown in Figure S4, samples included: (A) compound free *S. aureus* cells only that served as a live control, (B) *S. aureus* cells washed with ethanol that served as a dead control, (C) *S. aureus* cells exposed to **A<sub>3</sub>B<sup>+</sup>-NFC** and kept in the dark that served as dark control, and (D-F) *S. aureus* cells exposed to **A<sub>3</sub>B<sup>+</sup>-NFC** that were illuminated by non-coherent visible light at  $65 \pm 5$  mW/cm<sup>2</sup>. A 5  $\mu$ M solution of the **A<sub>3</sub>B<sup>+</sup>-NFC** was used for the dark control and the illuminated samples. Initially, the cells were separated from phosphate buffer saline (PBS) via centrifugation. Subsequently, the cells were washed with 0.9 % w/v sodium chloride (NaCl). Following this, the cells were resuspended in 0.9 % w/v NaCl, and a premix of SYTO9 : propidium iodide (1:1) was added. The cells were then vortexed, incubated at room temperature for 30 min, and then a few microliters of the stained cell solution were taken in a glass holder added with a coverslip and imaged with a Zeiss LSM 880 confocal microscope (NC State University Cellular and Molecular Imaging Facility, NSF grant DBI-1624613). Live cells possessing intact cell membranes are stained bright green by SYTO9, whereas the dead cells with the ruptured/damaged cell membranes are stained red and exhibit less/negligible green fluorescence. As seen in Figure S4, the fluorescent images for the material-free control (Figure S4A) and the material-present cells kept in the dark (Figure S4C) both show significantly higher number of live cells. As expected, the light illuminated samples (Figure S4D-F) only show dead cells, comparable to the ethanol treated dead control (Figure S4B), demonstrating that **A<sub>3</sub>B<sup>+</sup>-NFC** is bactericidal when illuminated.

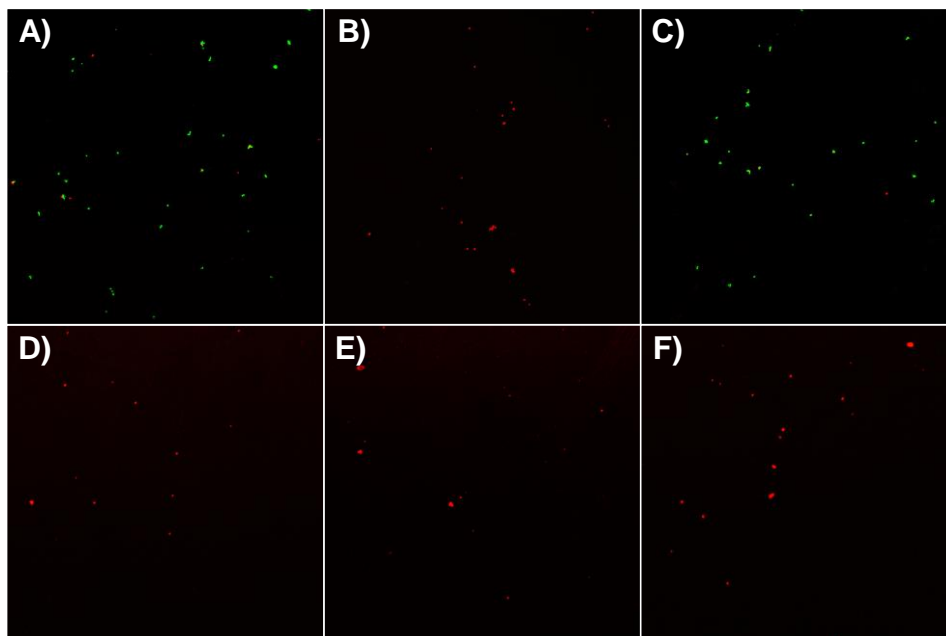

**Figure S4.** Confocal laser scanning microscopy images of A) material-free cells only (live control), B) *S. aureus* cells exposed to ethanol (dead control), C) *S. aureus* cells exposed to **A<sub>3</sub>B<sup>+</sup>-NFC** kept in dark (material-present dark control), and D-F) *S. aureus* cells exposed to **A<sub>3</sub>B<sup>+</sup>-NFC** illuminated at  $65 \pm 5$  mW/cm<sup>2</sup> for 60 minutes, 400-700 nm.

**Solution Based Antimicrobial Activity of  $A_3B^{3+}$  (3) and  $ZnA_3B^{3+}$  (4).** Solution studies comparing the antimicrobial efficacy of freebase  $A_3B^{3+}$  (3) and metallated  $ZnA_3B^{3+}$  (4) porphyrins in the inactivation of *K. pneumoniae* (KP), the least susceptible to PDI of the two Gram-negative strains in this study, were conducted (Figure S3). An initial test of  $A_3B^{3+}$  at a 1  $\mu$ M concentration resulted in no antimicrobial activity against KP, thus a higher concentration, 2.5  $\mu$ M, was pursued. Inactivation studies at 2.5  $\mu$ M concentrations revealed a 98.2734% ( $P < 0.0001$ ) and 99.9991% ( $P = 0.0002$ ) reduction in *K. pneumoniae* for  $A_3B^{3+}$  and  $ZnA_3B^{3+}$  respectively. Studies conducted at 5  $\mu$ M yielded a 99.9996% ( $P < 0.0001$ ) and 99.9999% ( $P = 0.0004$ ) reduction in KP for  $A_3B^{3+}$  and  $ZnA_3B^{3+}$ . The metallated macrocycle exhibited a greater degree of PDI activity, as was expected, due to the heavy atom effect, which increases excited triplet state quantum yields toward singlet oxygen generation.

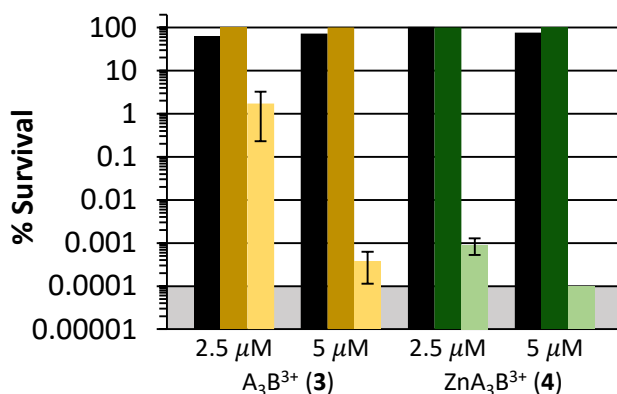

**Figure S5.** Solution-based photodynamic inactivation studies of *K. pneumoniae* using  $A_3B^{3+}$  (3) and  $ZnA_3B^{3+}$  (4) as photosensitizers. Displayed are the compound-free (cells-only) control (black bars), as well as the dark controls of  $A_3B^{3+}$  (dark yellow) and  $ZnA_3B^{3+}$  (dark green), and the illuminated studies of  $A_3B^{3+}$  (light yellow) and  $ZnA_3B^{3+}$  (light green) displayed as the percent survival of the compound-free control. The illumination conditions were as follows: 60 min, 400–700 nm,  $65 \pm 5$  mW/cm<sup>2</sup>. As the plating technique employed to determine % survival did not allow for detection of survival rates of <0.0001%, data points below the detection limit were set to 0.0001% survival for graphing purposes and are indicated by the grey shaded area.

## References

1. X. Ragàs, D. Sánchez-García, R. Ruiz-González, T. Dai, M. Agut, M. R. Hamblin and S. Nonell, *Journal of Medicinal Chemistry*, 2010, **53**, 7796-7803.
2. Joseph R. Lakowicz, *Principles of Fluorescence Spectroscopy*, Kluwer Academic/Plenum Publishers, New York, 2nd edn., 1999.
